# Supplementary material
Source: PubMed Central journal article supplement (PMC1989155)

### Supplemental Experimental Procedures

CD8 T cells from naïve OT-I TCR-Tg mice were enriched by negative selection. CD44<sup>hi</sup> cells were depleted by incubation with PE-conjugated anti-mouse CD44 (clone IM7, eBioscience, San Diego, CA) diluted 1:200, followed by labeling with anti-PE coated magnetic beads (Miltenyi Biotec, Auburn, CA) according to manufacturer's instructions. Cells were separated into 2 populations by serial passage over 2 manual drip LS columns. Cells retained on the column were CD44<sup>int-hi</sup>, and cells collected in the flow through were CD44<sup>lo</sup>.

**Supplemental Figure 1.** – *Magnitude of naïve TCR-Tg T cell expansion in vivo is not influenced by CD44<sup>hi</sup> TCR-Tg T cells.* **(A)** Enriched OT-I Thy1.1 cells from naïve mice (Pre-separation) were separated into CD44<sup>low</sup> ( Post-Flow Thru) and CD44<sup>int-hi</sup> (Post-Retained) and transferred (100 or 1,000 cells/mouse) into naïve C57Bl/6 mice before infection with Att LM-Ova ( $5 \times 10^6$  CFU/mouse). Numbers represent either frequency of OT-I ( $V\beta 5^+/CD8^+$ ) T cells (upper row) or frequency of CD44<sup>+</sup> OT-I T cells before or after selection (bottom row). **(B)** Detection of OT-I Thy1.1 cells in the blood of representative mice on day 6 p.i. Numbers represent the frequency of OT-I cells among PBL. **(C)** Percent (mean + SD for 2-3 mice per group) of OT-I cells detected in the blood at day 6 p.i. in the various groups of mice.

JT Harty - Supplemental Figure 1.

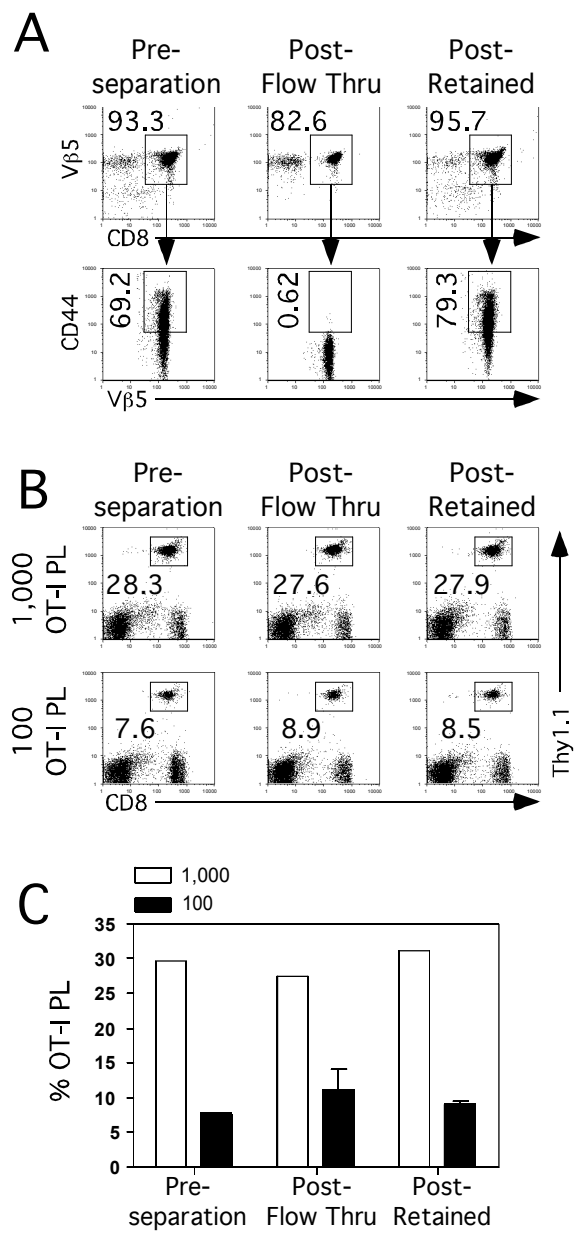

Supplement: NIHMS26145-supplement-01.pdf [file NIHMS26145-supplement-01.pdf]
